# Supplementary material for: The Methyltransferase HemK Regulates the Virulence and Nutrient Utilization of the Phytopathogenic Bacterium Xanthomonas citri Subsp. citri
Source: MDPI journal article supplement (doi:10.3390/ijms23073931), 2022-04-01
Supplement: s1 [file s1]

**Supplementary Table S1.** Differentially expressed genes of the *hemK* mutant  
(q-values < 0.05 and a minimum absolute |log<sub>2</sub>(Fold\_change)| > 1)

| Locus tag  | Gene name | Gene description                            | Log <sub>2</sub> Fold<br>_change |
|------------|-----------|---------------------------------------------|----------------------------------|
| Novel00007 | -         | -                                           | -1.40                            |
| Novel00013 | -         | -                                           | -1.24                            |
| Novel00014 | -         | -                                           | -1.32                            |
| Novel00094 | -         | -                                           | -4.64                            |
| Novel00102 | -         | -                                           | -2.60                            |
| Novel00110 | -         | -                                           | -1.48                            |
| Novel00116 | -         | -                                           | -1.72                            |
| XAC0076    | avrBs2    | avirulence protein                          | -1.44                            |
| XAC0108    | atsE      | AtsE                                        | -1.20                            |
| XAC0162    | dctP      | C4-dicarboxylate transport system           | -1.79                            |
| XAC0163    | dctQ      | C4-dicarboxylate membrane transport protein | -1.20                            |
| XAC0172    | XAC0172   | conserved hypothetical protein              | -1.01                            |
| XAC0239    | XAC0239   | conserved hypothetical protein              | -1.06                            |
| XAC0277    | XAC0277   | conserved hypothetical protein              | -1.58                            |
| XAC0286    | avrXacE1  | avirulence protein                          | -2.11                            |
| XAC0315    | XAC0315   | hypothetical protein                        | -1.52                            |
| XAC0330    | cmfA      | conditioned medium factor                   | -1.22                            |
| XAC0345    | ilvD      | dihydroxy-acid dehydratase                  | -1.80                            |
| XAC0346    | XAC0346   | degenerated cellulase                       | -1.05                            |
| XAC0362    | pobB      | phenoxybenzoate dioxygenase beta subunit    | -1.03                            |
| XAC0393    | hpaF      | HpaF protein                                | -1.29                            |
| XAC0394    | hrpF      | HrpF protein                                | -2.46                            |
| XAC0395    | XAC0395   | hypothetical protein                        | -2.02                            |
| XAC0396    | hpaB      | HpaB protein                                | -2.97                            |
| XAC0397    | hrpE      | HrpE protein                                | -3.44                            |
| XAC0398    | hrpD6     | HrpD6 protein                               | -2.84                            |
| XAC0399    | hrpD5     | HrpD5 protein                               | -2.72                            |
| XAC0400    | hpaA      | HpaA protein                                | -3.10                            |
| XAC0401    | hrcS      | HrcS protein                                | -3.72                            |
| XAC0402    | hrcR      | HrcR protein                                | -3.10                            |
| XAC0403    | hrcQ      | HrcQ protein                                | -3.39                            |
| XAC0404    | hpaP      | HpaP protein                                | -2.78                            |
| XAC0405    | hrcV      | HrcV protein                                | -2.70                            |
| XAC0406    | hrcU      | HrcU protein                                | -3.15                            |
| XAC0407    | hrpB1     | HrpB1 protein                               | -3.98                            |
| XAC0408    | hrpB2     | HrpB2 protein                               | -4.39                            |
| XAC0409    | hrcJ      | HrcJ protein                                | -3.80                            |
| XAC0410    | hrpB4     | HrpB4 protein                               | -2.82                            |
| XAC0411    | hrpB5     | HrpB5 protein                               | -2.76                            |

(Continued on next page)

**Table S1.** (Continued from previous page)

| Locus tag | Gene name | Gene description                                             | Log <sub>2</sub> Fold Change |
|-----------|-----------|--------------------------------------------------------------|------------------------------|
| XAC0412   | hrcN      | HrcN protein                                                 | -2.32                        |
| XAC0413   | hrpB7     | HrpB7 protein                                                | -2.20                        |
| XAC0414   | hrcT      | HrcT protein                                                 | -1.65                        |
| XAC0415   | hrcC      | HrcC protein                                                 | -1.38                        |
| XAC0416   | hpa1      | Hpa1 protein                                                 | -4.65                        |
| XAC0417   | hpa2      | Hpa2 protein                                                 | -2.55                        |
| XAC0419   | XAC0419   | conserved hypothetical protein && -                          | -1.44                        |
| XAC0435   | virK      | VirK protein                                                 | -2.47                        |
| XAC0465   | XAC0465   | metalloproteinase                                            | -1.01                        |
| XAC0501   | XAC0501   | conserved hypothetical protein                               | -1.83                        |
| XAC0543   | XAC0543   | conserved hypothetical protein                               | -2.47                        |
| XAC0545   | aroG      | phospho-2-dehydro-3-deoxyheptonate aldolase%2C phe-sensitive | -1.15                        |
| XAC0552   | XAC0552   | endoproteinase Arg-C                                         | -2.17                        |
| XAC0605   | XAC0605   | conserved hypothetical protein                               | -1.35                        |
| XAC0606   | XAC0606   | endonuclease                                                 | -1.24                        |
| XAC0612   | engXCA    | cellulase                                                    | -1.32                        |
| XAC0661   | peh-1     | endopolygalacturonase                                        | -2.42                        |
| XAC0678   | XAC0678   | conserved hypothetical protein                               | -1.13                        |
| XAC0682   | XAC0682   | conserved hypothetical protein                               | -1.28                        |
| XAC0754   | XAC0754   | hypothetical protein                                         | -2.29                        |
| XAC0795   | xcp       | protease                                                     | -2.19                        |
| XAC0802   | XAC0802   | sulfotransferase                                             | -1.54                        |
| XAC0803   | XAC0803   | methyltransferase                                            | -1.28                        |
| XAC0817   | XAC0817   | hypothetical protein                                         | -1.81                        |
| XAC0878   | pcaH      | protocatechuate 3%2C4-dioxygenase beta chain                 | -1.89                        |
| XAC0879   | ligA      | protocatechuate degradation protein                          | -2.27                        |
| XAC0880   | pcaQ      | transcriptional regulator                                    | -1.72                        |
| XAC0933   | XAC0933   | truncated xylanase                                           | -1.02                        |
| XAC0999   | cirA      | colicin I receptor                                           | -1.07                        |
| XAC1059   | ard       | antirestriction protein                                      | -1.61                        |
| XAC1171   | stkXac1   | serine/threonine kinase                                      | -1.62                        |
| XAC1137   | prpB      | carboxyphosphoenolpyruvate phosphonmutase                    | -1.11                        |
| XAC1172   | XAC1172   | conserved hypothetical protein                               | -1.55                        |
| XAC1187   | XAC1187   | hydroxylase large subunit                                    | -1.31                        |
| XAC1241   | XAC1241   | hypothetical protein                                         | -1.91                        |
| XAC1266   | hrpXct    | HrpX protein                                                 | -1.24                        |
| XAC1430   | dapD      | 2%2C3%2C4%2C5-tetrahydropyridine-2-carboxylate N-succin      | -1.10                        |
| XAC1431   | XAC1431   | conserved hypothetical protein                               | -1.02                        |

(Continued on next page)

**Table S1.** (Continued from previous page)

| Locus tag | Gene name | Gene description                                                                      | Log <sub>2</sub> Fold Change |
|-----------|-----------|---------------------------------------------------------------------------------------|------------------------------|
| XAC1432   | dapE      | succinyl-diaminopimelate desuccinylase                                                | -1.07                        |
| XAC1471   | XAC1471   | conserved hypothetical protein                                                        | -1.06                        |
| XAC1556   | fucP      | glucose-galactose transporter                                                         | -1.26                        |
| XAC1557   | scrK      | fructokinase                                                                          | -1.17                        |
| XAC1666   | tsr       | chemotaxis protein                                                                    | -1.07                        |
| XAC1820   | metL      | aspartokinase                                                                         | -3.35                        |
| XAC1821   | thrB      | homoserine kinase                                                                     | -3.39                        |
| XAC1823   | thrC      | threonine synthase                                                                    | -3.60                        |
| XAC1827   | XAC1827   | conserved hypothetical protein                                                        | -3.16                        |
| XAC1828   | hisG      | ATP phosphoribosyltransferase                                                         | -2.43                        |
| XAC1829   | hisD      | histidinol dehydrogenase                                                              | -2.29                        |
| XAC1830   | hisC      | histidinol-phosphate aminotransferase                                                 | -2.36                        |
| XAC1831   | hisB      | imidazoleglycerolphosphate<br>dehydratase/histidinol-phosphate<br>bifunctional enzyme | -2.46                        |
| XAC1832   | hisH      | amidotransferase                                                                      | -1.90                        |
| XAC1833   | hisA      | phosphoribosylformimino-5-<br>carboxam                                                | aminoimidazole -2.21         |
| XAC1834   | hisF      | cyclase                                                                               | -2.26                        |
| XAC1835   | hisI      | phosphoribosyl-AMP cyclohydrolase/<br>pyrophosphatase bifunctional enzyme             | -2.40                        |
| XAC1892   | tsr       | chemotaxis protein                                                                    | -1.11                        |
| XAC1893   | tsr       | chemotaxis protein                                                                    | -1.91                        |
| XAC1894   | tsr       | chemotaxis protein                                                                    | -1.37                        |
| XAC1895   | tsr       | chemotaxis protein                                                                    | -2.44                        |
| XAC1922   | XAC1922   | hypothetical protein                                                                  | -1.07                        |
| XAC2151   | yapH      | YapH protein                                                                          | -1.76                        |
| XAC2370   | XAC2370   | conserved hypothetical protein                                                        | -1.24                        |
| XAC2653   | S         | phage-related tail protein                                                            | -2.57                        |
| XAC2654   | XAC2654   | conserved hypothetical protein                                                        | -3.00                        |
| XAC2786   | XAC2786   | conserved hypothetical protein                                                        | -2.36                        |
| XAC2787   | XAC2787   | hypothetical protein                                                                  | -1.37                        |
| XAC2830   | fhuA      | TonB-dependent receptor                                                               | -1.30                        |
| XAC2831   | XAC2831   | extracellular serine protease                                                         | -2.72                        |
| XAC2832   | XAC2832   | conserved hypothetical protein                                                        | -2.24                        |
| XAC2833   | XAC2833   | extracellular serine protease                                                         | -1.12                        |
| XAC2853   | XAC2853   | cysteine protease                                                                     | -4.49                        |
| XAC2922   | hrpW      | HrpW protein                                                                          | -2.74                        |
| XAC2976   | XAC2976   | conserved hypothetical protein                                                        | -1.06                        |
| XAC2990   | XAC2990   | hypothetical protein                                                                  | -1.00                        |

(Continued on next page)

**Table S1.** (Continued from previous page)

| Locus tag | Gene name | Gene description                                | Log <sub>2</sub> FoldC<br>hange |
|-----------|-----------|-------------------------------------------------|---------------------------------|
| XAC2992   | XAC2992   | endoproteinase Arg-C                            | -1.55                           |
| XAC3014   | rebB      | RebB protein                                    | -1.70                           |
| XAC3015   | rebB      | RebB protein                                    | -2.13                           |
| XAC3016   | rebA      | RebA protein                                    | -1.93                           |
| XAC3017   | rebB      | RebB protein                                    | -2.87                           |
| XAC3018   | XAC3018   | hypothetical protein                            | -1.13                           |
| XAC3019   | XAC3019   | hypothetical protein                            | -1.03                           |
| XAC3021   | XAC3021   | hypothetical protein                            | -1.97                           |
| XAC3022   | XAC3022   | hypothetical protein                            | -1.20                           |
| XAC3085   | XAC3085   | conserved hypothetical protein                  | -1.12                           |
| XAC3087   | rebB      | rebB protein                                    | -1.81                           |
| XAC3088   | XAC3088   | hypothetical protein                            | -1.28                           |
| XAC3090   | XAC3090   | leucin rich protein                             | -1.88                           |
| XAC3114   | pqqG      | pyrroloquinoline quinone biosynthesis protein G | -1.07                           |
| XAC3191   | btuR      | cob(I)alamin adenolsyltransferase               | -1.37                           |
| XAC3230   | XAC3230   | hypothetical protein                            | -1.53                           |
| XAC3447   | thiC      | thiamine biosynthesis protein                   | -1.93                           |
| XAC3451   | ilvC      | ketol-acid reductoisomerase                     | -2.66                           |
| XAC3452   | ilvG      | acetolactate synthase isozyme II large subunit  | -2.22                           |
| XAC3453   | ilvM      | acetolactate synthase isozyme II small subunit  | -2.53                           |
| XAC3454   | tdcB      | threonine dehydratase catabolic                 | -2.14                           |
| XAC3455   | leuA      | 2-isopropylmalate synthase                      | -1.30                           |
| XAC3488   | sucI      | sugar transporter                               | -1.41                           |
| XAC3489   | fyuA      | TonB-dependent receptor                         | -2.32                           |
| XAC3490   | XAC3490   | amylase or alpha amylase                        | -1.90                           |
| XAC3545   | XAC3545   | protease                                        | -2.18                           |
| XAC3546   | xadA      | outer membrane protein                          | -1.66                           |
| XAC3604   | XAC3604   | conserved hypothetical protein                  | -1.45                           |
| XAC3646   | XAC3646   | hypothetical protein                            | -1.25                           |
| XAC3647   | pheA      | chorismate mutase                               | -1.79                           |
| XAC3664   | ompW      | outer membrane protein                          | -1.74                           |
| XAC3666   | XAC3666   | hypothetical protein                            | -1.25                           |
| XAC3684   | XAC3684   | conserved hypothetical protein                  | -1.23                           |
| XAC3685   | XAC3685   | conserved hypothetical protein                  | -1.40                           |
| XAC3703   | XAC3703   | conserved hypothetical protein                  | -1.24                           |
| XAC3769   | nucA      | endonuclease precursor                          | -1.50                           |
| XAC3844   | XAC3844   | conserved hypothetical protein                  | -1.00                           |
| XAC3845   | XAC3845   | conserved hypothetical protein                  | -1.13                           |
| XAC3866   | XAC3866   | conserved hypothetical protein                  | -1.61                           |
| XAC3878   | XAC3878   | disulphide-isomerase                            | -1.50                           |

(Continued on next page)

**Table S1.** (Continued from previous page)

| Locus tag  | Gene name | Gene description                                                                           | Log <sub>2</sub> FoldC<br>hange |
|------------|-----------|--------------------------------------------------------------------------------------------|---------------------------------|
| XAC3921    | ugt       | glucosyltransferase                                                                        | -1.21                           |
| XAC3922    | entF      | ATP-dependent serine activating enzyme                                                     | -1.18                           |
| XAC3963    | XAC3963   | tRNA-Ala                                                                                   | -2.24                           |
| XAC3964    | XAC3964   | conserved hypothetical protein                                                             | -2.89                           |
| XAC3965    | XAC3965   | conserved hypothetical protein                                                             | -1.67                           |
| XAC3966    | XAC3966   | conserved hypothetical protein                                                             | -1.12                           |
| XAC4007    | XAC4007   | conserved hypothetical protein                                                             | -1.03                           |
| XAC4048    | iroN      | TonB-dependent receptor                                                                    | -1.60                           |
| XAC4063    | XAC4063   | hypothetical protein                                                                       | -1.07                           |
| XAC4078    | mgtE      | Mg <sup>++</sup> transporter                                                               | -1.72                           |
| XAC4169    | mltA      | transglycosylase associated protein                                                        | -1.05                           |
| XAC4327    | uahA      | urea amidolyase                                                                            | -1.83                           |
| XAC4333    | XAC4333   | conserved hypothetical protein                                                             | -1.22                           |
| XAC2859    | XAC2859   | hypothetical protein                                                                       | 4.82                            |
| XAC2363    | XAC2363   | hypothetical protein                                                                       | 4.05                            |
| Novel00011 | -         | -                                                                                          | 3.22                            |
| XAC2338    | XAC2338   | conserved hypothetical protein                                                             | 2.73                            |
| XAC2749    | XAC2749   | methylated-DNA-protein-cysteine<br>methyltransferase related protein                       | S- 2.70                         |
| XAC0919    | pntA      | pyridine nucleotide transhydrogenase                                                       | 2.67                            |
| XAC2337    | cydB      | cytochrome D ubiquinol oxidase subunit II                                                  | 2.63                            |
| XAC3658    | XAC3658   | hypothetical protein                                                                       | 2.29                            |
| XAC0830    | tauD      | taurine dioxygenase                                                                        | 2.21                            |
| XAC2033    | mobA      | molybdopterin guanine dinucleotide synthase &&<br>PF12804:MobA-like NTP transferase domain | 2.11                            |
| XAC0657    | mreC      | rod shape-determining protein                                                              | 2.04                            |
| XAC2264    | XAC2264   | hypothetical protein                                                                       | 2.00                            |
| XAC1706    | XAC1706   | conserved hypothetical protein                                                             | 1.96                            |
| XAC3255    | XAC3255   | hypothetical protein                                                                       | 1.94                            |
| XAC1639    | sdeB      | atrazine chlorohydrolase                                                                   | 1.89                            |
| Novel00097 | -         | PF12836:Helix-hairpin-helix motif                                                          | 1.87                            |
| XAC1181    | XAC1181   | conserved hypothetical protein                                                             | 1.85                            |
| Novel00012 | -         | -                                                                                          | 1.85                            |
| XAC2951    | comEA     | DNA transport competence protein                                                           | 1.84                            |
| XAC1980    | flgH      | flagellar L-ring protein                                                                   | 1.80                            |
| XAC1638    | hutI      | imidazolonepropionase                                                                      | 1.77                            |
| XAC1704    | XAC1704   | ABC transporter ATP-binding protein                                                        | 1.76                            |
| XAC2558    | XAC2558   | excinuclease ABC subunit C homolog                                                         | 1.72                            |
| XAC2608    | XAC2608   | VirB6 protein                                                                              | 1.69                            |
| XAC3354    | ompW      | outer membrane protein W                                                                   | 1.68                            |

(Continued on next page)

**Table S1.** (Continued from previous page)

| Locus tag | Gene name | Gene description                                                   | Log <sub>2</sub> FoldC<br>hange |
|-----------|-----------|--------------------------------------------------------------------|---------------------------------|
| XAC3927   | XAC3927   | conserved hypothetical protein                                     | 1.66                            |
| XAC0637   | hslV      | ATP-dependent HslUV protease peptidase subunit<br>HslV             | 1.65                            |
| XAC2528   | htpG      | heat shock protein G                                               | 1.64                            |
| XAC2336   | cydA      | cytochrome D ubiquinol oxidase subunit I                           | 1.59                            |
| XAC0453   | XAC0453   | conserved hypothetical protein                                     | 1.59                            |
| XAC0505   | XAC0505   | conserved hypothetical protein                                     | 1.58                            |
| XAC2334   | cydC      | ABC transporter ATP-binding protein                                | 1.57                            |
| XAC0638   | hslU      | ATP-dependent HslUV protease ATP-binding<br>subunit HslU           | 1.57                            |
| XAC1300   | hslR      | heat shock protein 15 homolog                                      | 1.57                            |
| XAC1522   | dnaK      | DnaK protein                                                       | 1.57                            |
| XAC3195   | clpB      | ATP-dependent Clp protease subunit                                 | 1.55                            |
| XAC1816   | XAC1816   | hemagglutinin/hemolysin-related protein                            | 1.55                            |
| XAC2146   | XAC2146   | hypothetical protein                                               | 1.50                            |
| XAC1521   | grpE      | heat shock protein GrpE                                            | 1.48                            |
| XAC2034   | XAC2034   | conserved hypothetical protein                                     | 1.47                            |
| XAC2335   | strW      | transport protein                                                  | 1.46                            |
| XAC3608   | uptB      | maleylacetoacetate isomerase                                       | 1.46                            |
| XAC2397   | XAC2397   | conserved hypothetical protein                                     | 1.45                            |
| XAC3962   | XAC3962   | hypothetical protein                                               | 1.43                            |
| XAC1941   | fliR      | flagellar biosynthetic protein                                     | 1.42                            |
| XAC3754   | XAC3754   | conserved hypothetical protein                                     | 1.40                            |
| XAC1635   | hutU      | urocanate hydratase                                                | 1.40                            |
| XAC1092   | XAC1092   | tRNA-Ser                                                           | 1.39                            |
| XAC2312   | XAC2312   | conserved hypothetical protein                                     | 1.37                            |
| XAC2362   | XAC2362   | conserved hypothetical protein                                     | 1.34                            |
| XAC2200   | XAC2200   | hypothetical protein                                               | 1.33                            |
| XAC3121   | fepA      | TonB-dependent receptor                                            | 1.33                            |
| XAC3301   | XAC3301   | conserved hypothetical protein                                     | 1.32                            |
| XAC1937   | flhB      | flagellar protein                                                  | 1.31                            |
| XAC1985   | flgC      | flagellar biosynthesis cell-proximal portion of basal-<br>body rod | 1.30                            |
| XAC4206   | XAC4206   | hypothetical protein                                               | 1.29                            |
| XAC1151   | hspA      | low molecular weight heat shock protein                            | 1.28                            |
| XAC2978   | ptsH      | phosphotransferase system HPr enzyme                               | 1.28                            |
| XAC3120   | glk       | glucose kinase                                                     | 1.27                            |
| XAC1637   | hutH      | histidine ammonia-lyase                                            | 1.27                            |
| XAC0541   | groES     | 10kDa chaperonin                                                   | 1.27                            |
| XAC1636   | hutG      | formylglutamate amidohydrolase                                     | 1.26                            |

(Continued on next page)

**Table S1.** (Continued from previous page)

| Locus tag  | Gene name | Gene description                        | Log <sub>2</sub> FoldChange |
|------------|-----------|-----------------------------------------|-----------------------------|
| XAC0900    | pms       | peptide methionine sulfoxide reductase  | 1.26                        |
| XAC0627    | XAC0627   | conserved hypothetical protein          | 1.26                        |
| XAC2399    | htpX      | heat shock protein                      | 1.26                        |
| XAC2742    | btuB      | TonB-dependent receptor                 | 1.25                        |
| XAC1986    | flgB      | flagellar protein                       | 1.25                        |
| XAC1935    | flhF      | flagellar protein                       | 1.23                        |
| XAC4268    | XAC4268   | conserved hypothetical protein          | 1.22                        |
| XAC0755    | XAC0755   | conserved hypothetical protein          | 1.22                        |
| XAC0127    | XAC0127   | conserved hypothetical protein          | 1.22                        |
| XAC2863    | XAC2863   | hypothetical protein                    | 1.21                        |
| XAC2375    | XAC2375   | conserved hypothetical protein          | 1.21                        |
| XAC1705    | XAC1705   | MFS transporter                         | 1.20                        |
| XAC2783    | trx       | thioredoxin                             | 1.19                        |
| XAC3691    | XAC3691   | conserved hypothetical protein          | 1.19                        |
| XAC0087    | XAC0087   | hypothetical protein                    | 1.18                        |
| XAC3609    | uptA      | fumarylacetoacetate hydrolase           | 1.17                        |
| XAC3635    | XAC3635   | conserved hypothetical protein          | 1.16                        |
| XAC0542    | groEL     | 60 kDa chaperonin                       | 1.16                        |
| XAC2483    | XAC2483   | conserved hypothetical protein          | 1.16                        |
| XAC1741    | recX      | RecX protein                            | 1.16                        |
| Novel00010 | -         | PF00118:TCP-1/cpn60 chaperonin family   | 1.16                        |
| XAC4216    | tatC      | sec-independent protein translocase     | 1.15                        |
| XAC1740    | recA      | RecA protein                            | 1.15                        |
| XAC1984    | flgD      | flagellar protein                       | 1.15                        |
| XAC1955    | fliE      | flagellar protein                       | 1.15                        |
| XAC1593    | XAC1593   | ABC transporter ATP-binding protein     | 1.14                        |
| XAC2228    | XAC2228   | transcriptional regulator tetR family   | 1.14                        |
| XAC3444    | btuB      | TonB-dependent receptor                 | 1.13                        |
| XAC4286    | mutM      | formamidopyrimidine DNA glycosylase     | 1.13                        |
| XAC4104    | XAC4104   | hypothetical protein                    | 1.12                        |
| XAC0077    | XAC0077   | conserved hypothetical protein          | 1.12                        |
| XAC1950    | fliJ      | flagellar FliJ protein                  | 1.11                        |
| XAC1936    | flhA      | flagellar protein                       | 1.11                        |
| XAC1982    | flgF      | flagellar protein                       | 1.11                        |
| XAC3792    | ribA      | riboflavin biosynthesis protein         | 1.11                        |
| XAC1362    | nerA      | GTN reductase                           | 1.11                        |
| XAC1850    | hadH2     | 3-hydroxyacyl-CoA dehydrogenase type II | 1.10                        |
| XAC2626    | fimT      | fimbrial biogenesis protein             | 1.10                        |
| XAC2080    | XAC2080   | conserved hypothetical protein          | 1.10                        |
| XAC3755    | XAC3755   | conserved hypothetical protein          | 1.09                        |

(Continued on next page)

**Table S1.** (Continued from previous page)

| Locus tag | Gene name | Gene description                                                                                            | Log <sub>2</sub> FoldC<br>hange |
|-----------|-----------|-------------------------------------------------------------------------------------------------------------|---------------------------------|
| XAC3363   | blaI      | transcriptional regulator blaI family                                                                       | 1.09                            |
| XAC1942   | fliQ      | flagellar biosynthesis                                                                                      | 1.08                            |
| XAC3353   | XAC3353   | conserved hypothetical protein                                                                              | 1.08                            |
| XAC3961   | XAC3961   | transcriptional regulator tetR family                                                                       | 1.08                            |
| XAC3636   | XAC3636   | conserved hypothetical protein                                                                              | 1.06                            |
| XAC0691   | XAC0691   | conserved hypothetical protein                                                                              | 1.05                            |
| XAC0253   | XAC0253   | transcriptional regulator araC family                                                                       | 1.05                            |
| XAC3460   | XAC3460   | conserved hypothetical protein                                                                              | 1.05                            |
| XAC1278   | XAC1278   | conserved hypothetical protein                                                                              | 1.05                            |
| XAC2887   | XAC2887   | conserved hypothetical protein                                                                              | 1.04                            |
| XAC0134   | XAC0134   | beta-lactamase                                                                                              | 1.04                            |
| XAC3823   | XAC3823   | conserved hypothetical protein                                                                              | 1.03                            |
| XAC0452   | XAC0452   | 4-hydroxyphenylpyruvate dioxygenase                                                                         | 1.02                            |
| XAC0775   | murE      | UDP-N-acetylmuramoylalanyl-D-glutamate-<br>2%2C6-diaminopimelate<br>domain PF08245:Mur ligase middle domain | 1.01                            |
| XAC2044   | mutT      | 7%2C8-dihydro-8-oxoguanine-triphosphatase                                                                   | 1.01                            |
| XAC0772   | mraW      | cell division protein                                                                                       | 1.00                            |
| XAC4279   | XAC4279   | conserved hypothetical protein                                                                              | 1.00                            |
| XAC1981   | flgG      | flagellar biosynthesis cell-distal portion of<br>body rod                                                   | basal- 1.00                     |



**Supplementary Table S2.** List of the enriched KEGG pathways with *Xcc* genes significantly changed in the  $\Delta hemK$  mutant

| KEGGID                                           | Description                                  | padj   | Gene Name                                                                                                         | Log2 Fold change         | Count |
|--------------------------------------------------|----------------------------------------------|--------|-------------------------------------------------------------------------------------------------------------------|--------------------------|-------|
| <b>1. Metabolism (37 pathways)</b>               |                                              |        |                                                                                                                   |                          |       |
| <b>1.1 Global and overview maps (6 pathways)</b> |                                              |        |                                                                                                                   |                          |       |
| xac01230                                         | Biosynthesis of amino acids                  | 0.0003 | metL/thrC/ilvC/thrB/hisI/hisD/ilvD/hisB/hisF/hisA/ilvG/hisG/tdcB/hisH/pheA/ilvM/dapD/leuA/dapE/aroG/hisC          | -3.6_-1.1                | 21    |
| xac01210                                         | 2-Oxocarboxylic acid metabolism              | 0.0821 | ilvC/ilvD/ilvG/ilvM/leuA                                                                                          | -2.7/-1.8/-2.2/-2.5/-1.3 | 5     |
| xac01110                                         | Biosynthesis of secondary metabolites        | 0.9932 | metL/thrC/ilvC/thrB/hisI/hisD/ilvD/hisB/hisF/hisA/ilvG/hisG/tdcB/hisH/pheA/ilvM/leuA/entF/scrK/ribA/glk/aroG/hisC | -3.6_1.3                 | 23    |
| xac01120                                         | Microbial metabolism in diverse environments | 0.9932 | metL/thrC/thrB/dapD/uptA/XAC1187/ne rA/uptB/dapE/uahA/glk                                                         | -3.6_1.5                 | 11    |
| xac01240                                         | Biosynthesis of cofactors                    | 0.9932 | thiC/XAC0452/ribA/btuR                                                                                            | -1.9/1.0/1.1/-1.4        | 4     |
| xac01200                                         | Carbon metabolism                            | 0.9932 | tdcB/glk                                                                                                          | -2.1/1.3                 | 2     |
| <b>1.2 Carbohydrate metabolism (11 pathways)</b> |                                              |        |                                                                                                                   |                          |       |
| xac00500                                         | Starch and sucrose metabolism                | 0.5732 | XAC3490/engXCA/scrK/XAC0346/glk                                                                                   | -1.9/-1.3/-1.2/-1.1/1.3  | 5     |
| xac00650                                         | Butanoate metabolism                         | 0.9932 | ilvG/ilvM                                                                                                         | -2.2/-2.5                | 2     |
| xac00520                                         | Amino sugar and nucleotide sugar metabolism  | 0.9932 | scrK/glk                                                                                                          | -1.2/1.3                 | 2     |
| xac00550                                         | Peptidoglycan biosynthesis                   | 0.9932 | murE                                                                                                              | 1.0                      | 1     |
| xac00040                                         | Pentose and glucuronate interconversions     | 0.9932 | peh-1                                                                                                             | -2.4                     | 1     |
| xac00051                                         | Fructose and mannose metabolism              | 0.9932 | scrK                                                                                                              | -1.2                     | 1     |
| xac00640                                         | Propanoate metabolism                        | 0.9932 | prpB                                                                                                              | -1.1                     | 1     |
| xac00052                                         | Galactose metabolism                         | 0.9932 | glk                                                                                                               | 1.3                      | 1     |
| xac00630                                         | Glyoxylate and dicarboxylate metabolism      | 0.9932 | hutG                                                                                                              | 1.3                      | 1     |
| xac00010                                         | Glycolysis / Gluconeogenesis                 | 0.9932 | glk                                                                                                               | 1.3                      | 1     |
| xac00620                                         | Pyruvate metabolism                          | 0.9932 | leuA                                                                                                              | -1.3                     | 1     |
| <b>1.3 Energy metabolism (2 pathways)</b>        |                                              |        |                                                                                                                   |                          |       |
| xac00190                                         | Oxidative                                    | 0.9932 | cydB/XAC2338/cydA                                                                                                 | 2.6/2.7/1.6              | 3     |

|                                                |                                             |          |                                                                  |                               |    |
|------------------------------------------------|---------------------------------------------|----------|------------------------------------------------------------------|-------------------------------|----|
|                                                | phosphorylation                             |          |                                                                  |                               |    |
| xac00920                                       | Sulfur metabolism                           | 0.9932   | tauD                                                             | 2.21                          | 1  |
| <b>1.4 Nucleotide metabolism (1 pathways)</b>  |                                             |          |                                                                  |                               |    |
| xac00230                                       | Purine metabolism                           | 0.9932   | XAC1187                                                          | -1.3                          | 1  |
| <b>1.5 Amino acid metabolism (10 pathways)</b> |                                             |          |                                                                  |                               |    |
| xac00340                                       | Histidine metabolism                        | 2.9E-10  | hisI/hisD/hisB/hisF/hisA/hisG/hisH/sdeB/hutU/hutH/hutI/hisC/hutG | -2.5_1.9                      | 13 |
| xac00290                                       | Valine, leucine and isoleucine biosynthesis | 1.2 E-10 | ilvC/ilvD/ilvG/tdcB/ilvM/leuA                                    | -2.7/-1.8/-2.2/-2.1/-2.5/-1.3 | 6  |
| xac00300                                       | Lysine biosynthesis                         | 0.08214  | metL/dapD/murE/dapE                                              | -3.4/-1.0/1.0/-1.1            | 4  |
| xac00350                                       | Tyrosine metabolism                         | 0.092943 | uptA/XAC0452/uptB/hisC                                           | 1.1/1.0/1.5/-2.4              | 4  |

(Continued on next page)

**Table S2.** (Continued from previous page)

| KEGGID                                                       | Description                                         | padj     | Gene Name           | Log 2Fold change     | Count |
|--------------------------------------------------------------|-----------------------------------------------------|----------|---------------------|----------------------|-------|
| xac00260                                                     | Glycine, serine and threonine metabolism            | 0.786303 | metL/thrC/thrB/tdcB | -3.4/-3.6/-3.4/-2.1  | 4     |
| xac00360                                                     | Phenylalanine metabolism                            | 0.806129 | XAC0452/hisC        | 1.0/-2.4             | 2     |
| xac00400                                                     | Phenylalanine, tyrosine and tryptophan biosynthesis | 0.930158 | pheA/aroG/hisC      | -1.8/-1.2/-2.4       | 3     |
| xac00220                                                     | Arginine biosynthesis                               | 0.993188 | uahA                | -1.8                 | 1     |
| xac00330                                                     | Arginine and proline metabolism                     | 0.993188 | XAC0691             | 1.1                  | 1     |
| xac00270                                                     | Cysteine and methionine metabolism                  | 0.993188 | metL                | -3.4                 | 1     |
| <b>1.6 Metabolism of cofactors and vitamins (6 pathways)</b> |                                                     |          |                     |                      |       |
| xac00770                                                     | Pantothenate and CoA biosynthesis                   | 0.158043 | ilvC/ilvD/ilvG/ilvM | -2.7/-1.8/-2.2/-2.5/ | 4     |
| xac00740                                                     | Riboflavin metabolism                               | 0.993188 | ribA                | 1.1                  | 1     |
| xac00760                                                     | Nicotinate and nicotinamide metabolism              | 0.993188 | pntA                | 2.7                  | 1     |
| xac00790                                                     | Folate biosynthesis                                 | 0.993188 | ribA/mobA           | 1.1/2.1              | 2     |
| xac00130                                                     | Ubiquinone and other terpenoid-quinone biosynthesis | 0.993188 | XAC0452             | 1.0                  | 1     |
| xac00860                                                     | Porphyrin and chlorophyll metabolism                | 0.993188 | btuR                | -1.4                 | 1     |

**1.7 Biosynthesis of other secondary metabolites (1 pathways)**

|                                                             |                               |          |                                                                     |                              |    |
|-------------------------------------------------------------|-------------------------------|----------|---------------------------------------------------------------------|------------------------------|----|
| xac00521                                                    | Streptomycin<br>biosynthesis  | 0.993188 | glk                                                                 | 1.3                          | 1  |
| <b>2. Genetic Information Processing (4 pathways)</b>       |                               |          |                                                                     |                              |    |
| <b>2.1 Folding, sorting and degradation</b>                 |                               |          |                                                                     |                              |    |
| xac03060                                                    | Protein export                | 0.993188 | tatC                                                                | 1.2                          | 1  |
| xac03018                                                    | RNA degradation               | 0.497374 | dnaK/-/groEL                                                        | 1.6/1.2/1.2                  | 3  |
| <b>2.2 Replication and repair</b>                           |                               |          |                                                                     |                              |    |
| xac03440                                                    | Homologous<br>recombination   | 0.993188 | recA                                                                | 1.2                          | 1  |
| xac03410                                                    | Base excision repair          | 0.96327  | mutM/XAC0606                                                        | 1.1/-1.2                     | 2  |
| <b>3. Environmental Information Processing (3 pathways)</b> |                               |          |                                                                     |                              |    |
| <b>3.1 Membrane transport (2 pathways)</b>                  |                               |          |                                                                     |                              |    |
| xac03070                                                    | Bacterial secretion<br>system | 0.044174 | hrcJ/hrcV/hrcQ/hrcU/hrcN/tatC/hrcC/hrp<br>B5/hrcR/hrcS/hrcT/XAC2608 | -3.8_1.7                     | 12 |
| xac02010                                                    | ABC transporters              | 0.993188 | cydC/strW                                                           | 1.6/1.5                      | 2  |
| <b>3.2 Signal transduction (2 pathways)</b>                 |                               |          |                                                                     |                              |    |
| xac02020                                                    | Two-component system          | 0.993188 | tsr/tsr/engXCA/tsr/tsr/tsr/XAC0346/cydB<br>/<br>XAC2338/cydA        | -2.4_2.6                     | 10 |
| <b>4. Cellular Processes (3 pathways)</b>                   |                               |          |                                                                     |                              |    |
| <b>4.1 Cellular community – prokaryotes (1 pathways)</b>    |                               |          |                                                                     |                              |    |
| xac02024                                                    | Quorum sensing                | 0.993188 | XAC3545/ribA/aroG                                                   | -2.2/1.1/-1.2                | 3  |
| <b>4.2 Cell motility (1 pathways)</b>                       |                               |          |                                                                     |                              |    |
| xac02040                                                    | Flagellar assembly            | 0.000594 | flgH/flgD/flgC/flgG/flgB/flgF/fliJ/flhA/<br>flhB/fliR/fliE/fliQ     | 1.0_1.8                      | 12 |
| xac02030                                                    | Bacterial chemotaxis          | 0.930158 | tsr/tsr/tsr/tsr/tsr                                                 | -1.1/-1.1/-<br>1.2/-1.4/-2.4 | 5  |

---

**Supplementary Table S3.** Bacterial strains and plasmids

| Strains and plasmids                | Relevant characteristic                                          | Origin         |
|-------------------------------------|------------------------------------------------------------------|----------------|
| <i>X. citri</i> subsp. <i>citri</i> |                                                                  |                |
| <i>X. citri</i> jx-6                | Wild type strain                                                 | Lab collection |
| $\Delta hemK$                       | <i>hemK</i> mutant of <i>X. citri</i> jx-6                       | This study     |
| C- $\Delta hemK$                    | Complementation strain of $\Delta hemK$ , Gm                     | This study     |
| <i>E. coli</i>                      |                                                                  |                |
| DH5 $\alpha$                        |                                                                  | Lab collection |
| Plasmids                            |                                                                  |                |
| pK18                                | Suicide vector, Gm                                               | Lab collection |
| pK18- $\Delta hemK$                 | <i>hemK</i> knock-out fragment ligated on pK18, Gm               | This study     |
| pBBR1MCS5-V5-<br>hemK               | <i>hemK</i> complementation fragment ligated on<br>pBBR1MCS5, Gm | This study     |

**Supplementary Table S4.** Primers used for strains construction and qRT-PCR analysis

| Primers    | Sequence (5'-3') <sup>a</sup>                  | Purpose                                   |
|------------|------------------------------------------------|-------------------------------------------|
| hemK-1F    | CGC <b>GATCC</b> TCCAGCGTCTTGATCACGC<br>CTTC   | For construction of pK18- $\Delta$ hemK   |
| hemK-2R    | TCAGCCGCCCTGGCCCGCAGCTGCGGC<br>GAGATCGTCGGACAT | For construction of pK18- $\Delta$ hemK   |
| hemK-3F    | ATGTCCGACGATCTCGCCGCAGCTGCGG<br>GCCAGGGCGGCTGA | For construction of pK18- $\Delta$ hemK   |
| hemK-4R    | GGG <b>AAGCTT</b> GTCATGCGGCGTAGAGCGG<br>CCGGA | For construction of pK18- $\Delta$ hemK   |
| hemK-5F    | ACTGTGCAGCGGTCAGCTTGCGCA                       | For detecting of pK18- $\Delta$ hemK      |
| hemK-6R    | TAGGCCAGCGCCAGCGTGATC                          | For detecting of pK18- $\Delta$ hemK      |
| hemK-F     | TCC <b>CCCGGG</b> ATGTCCGACGATCTCGCCG<br>C     | For construction of pBBR1MCS5-<br>V5-hemK |
| hemK-R     | GCAT <b>CTAGA</b> TCAGCCGCCCTGGCCCGCA<br>GCT   | For construction of pBBR1MCS5-<br>V5-hemK |
| pBAD-5'S   | CTGTTTCTCCATACCCGTT                            | A universal primer for pBBR1MCS5          |
| M13-F      | ACTGGCCGTCGTTTAC                               | A universal primer for pBBR1MCS5          |
| 16s-F      | TCGTATGCGGTATTAGCGTAAGT                        | For qPCR                                  |
| 16s-R      | TTTGATCCTGGCTCAGAGTGAAC                        | For qPCR                                  |
| hrpB2-F    | TGGTCGATGTGCAGAACGAT                           | For qPCR                                  |
| hrpB2-R    | ATGGTCAGCTCGTGCAATCA                           | For qPCR                                  |
| hpaA-F     | GACGCTGCAACACACATACC                           | For qPCR                                  |
| hpaA-R     | GGCTTCGTTCTCTTCCTGCT                           | For qPCR                                  |
| hrpE-F     | TGTTTCATGGACTTCTGGGCC                          | For qPCR                                  |
| hrpE-R     | GGTGGAATCTCTGGTGAGGC                           | For qPCR                                  |
| virK-F     | GATGTCAGTGTGAGCACCGA                           | For qPCR                                  |
| virK-R     | GGTGAAATGCGCATCGGAAA                           | For qPCR                                  |
| hrcC-F     | ACGCATCGGCCGATCTTTAT                           | For qPCR                                  |
| hrcC-R     | TCCACGGTGTGGATCCAAG                            | For qPCR                                  |
| avrXacE1-F | TCCACGTATCCGATTGAGCG                           | For qPCR                                  |
| avrXacE1-R | ATGGAACCTCGGTTTGCGGAT                          | For qPCR                                  |
| avrBs2-F   | GGTGTATCTGGATACCGCCG                           | For qPCR                                  |
| avrBs2-R   | TGAAGATGATGCGGCCTTGT                           | For qPCR                                  |
| XAC3545-F  | TGGTGGTCGAGCTCAAGAAC                           | For qPCR                                  |
| XAC3545-R  | CTCAGGTGCCACTGGTACTG                           | For qPCR                                  |
| engXCA-F   | TCGTTACAAGAACGTGCCGA                           | For qPCR                                  |
| engXCA-R   | GGTCGAACATACCGGGTTGT                           | For qPCR                                  |
| XAC3490-F  | GTGGATGTGGACCACGTTCT                           | For qPCR                                  |
| XAC3490-R  | GATAGGCCGTGGAATCCAGG                           | For qPCR                                  |
| XAC2853-F  | CTTTGCCCCGATGTACCTGT                           | For qPCR                                  |
| XAC2853-R  | TTTCCAGTCGTAGTTGCCCC                           | For qPCR                                  |
| XAC1893-F  | ACGCAGTTGCAACGTTTCTC                           | For qPCR                                  |

(Continued on next page)

**Table S4.** (Continued from previous page)

| Primers   | Sequence (5'-3') <sup>a</sup> | Purpose  |
|-----------|-------------------------------|----------|
| XAC1893-R | GTCCAGGTGCTCGAACATCA          | For qPCR |
| XAC1666-F | CAGCATCAACGCCTTCATCG          | For qPCR |
| XAC1666-R | ACATCACCATCAGCATCGCA          | For qPCR |
| hisC-F    | GTTGGTGTTCTGTGTTTCGC          | For qPCR |
| hisC-R    | AGATTGTCGTAACGCCCGAG          | For qPCR |

<sup>a</sup> The red ones are restriction sites.
